# Supplementary material for: Structural diversities and related properties of four coordination polymers synthesized from original ligand of 3,3′,5,5′-azobenzenetetracarboxylic acid
Source: Royal Society of Chemistry journal article supplement (doi:10.1039/c4dt03076a), 2014-12-04
Supplement: c4dt03076a1.pdf [file c4dt03076a1.pdf]

*Electronic Supplementary Information (ESI) for*

**Structural Diversities and Related Properties of Four Coordination Polymers  
Synthesized From Original Ligand of 3,3',5,5'-Azobenzene tetracarboxylic Acid**

Liming Fan,<sup>a,b</sup> Weiliu Fan,<sup>a</sup> Bin Li,<sup>b</sup> Xinzheng Liu,<sup>b</sup> Xian Zhao<sup>\*a</sup> and Xiutang Zhang,<sup>\*a,b</sup>

5 <sup>a</sup>Advanced Material Institute of Research, College of Chemistry and Chemical Engineering, Qilu Normal University,  
Jinan, 250013, China. <sup>b</sup>State Key Laboratory of Crystal Materials, Shandong University, Jinan 250100, China.

*E-mail: zhaoxian@icm.sdu.edu.cn; xiutangzhang@163.com.*

ESI

10

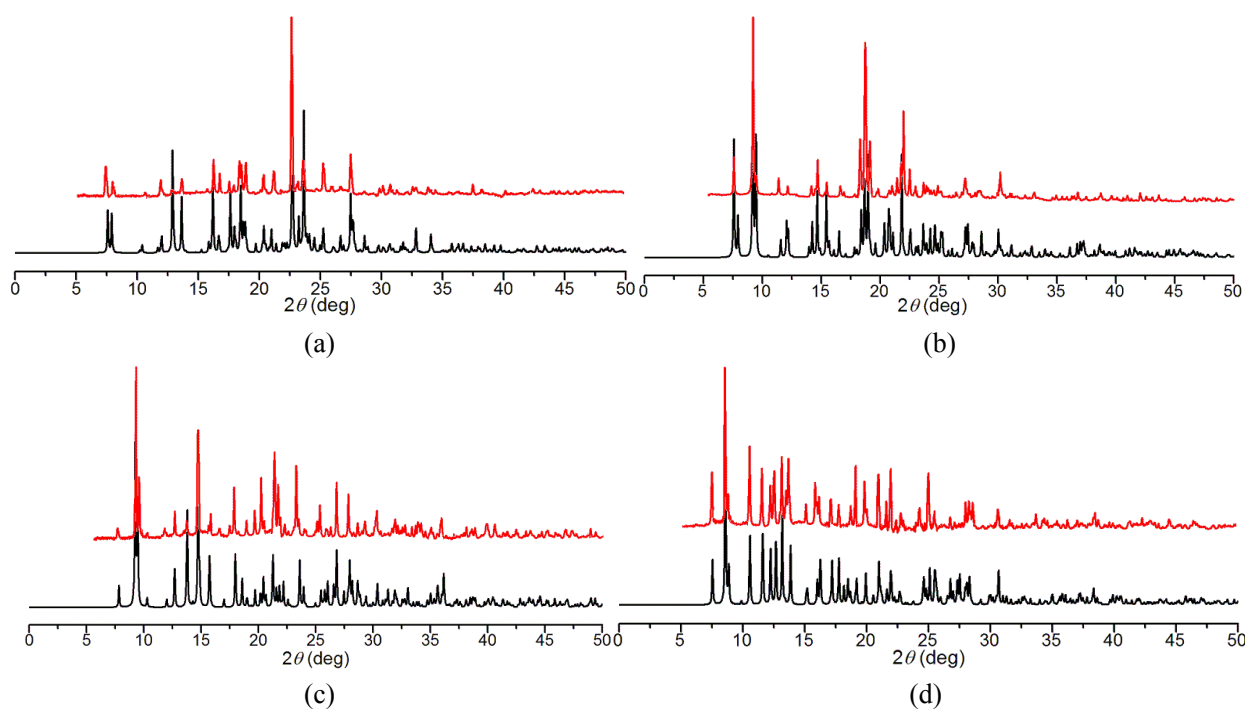

15

**Figure S1.** PXRD patterns of **1** (a), **2** (b), **3** (c), and **4** (d). Dark: calculated from the X-ray single-crystal data; Red: observed for the as-synthesized solids.

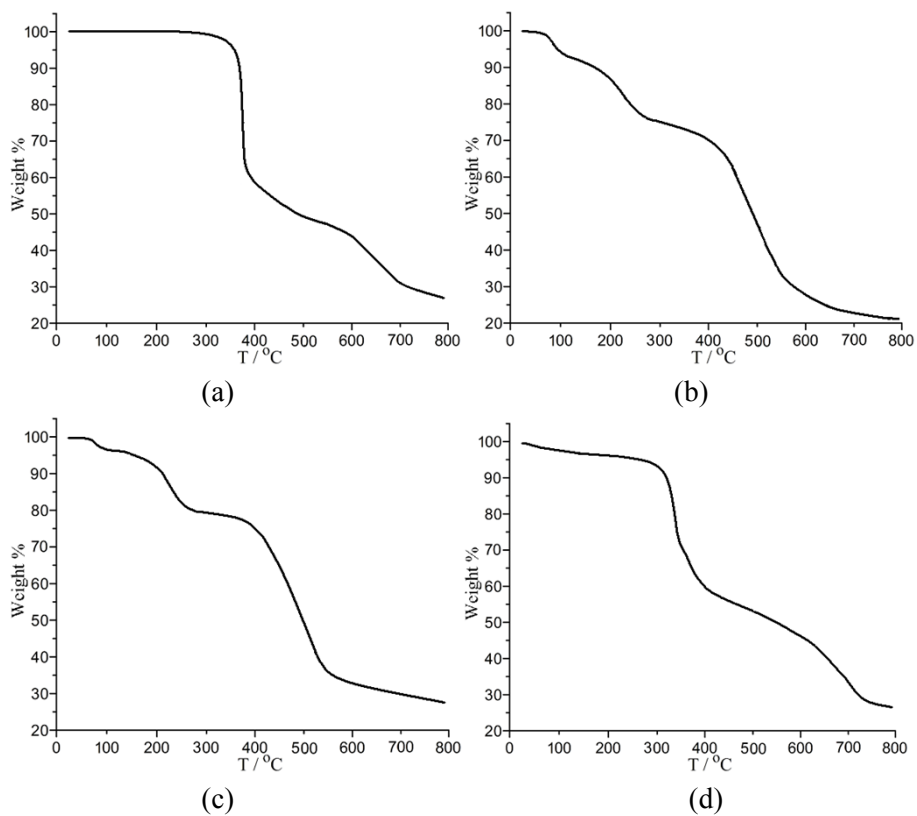

**Figure S2.** TG curves of **1** (a), **2** (b), **3** (c), and **4** (d).

**Table S1** Selected bond lengths (Å) and angles (°) for **1 – 4**.

|                                                                                                                                                          |            |                                                |            |                                               |            |                                               |            |
|----------------------------------------------------------------------------------------------------------------------------------------------------------|------------|------------------------------------------------|------------|-----------------------------------------------|------------|-----------------------------------------------|------------|
| <b>Complex 1</b>                                                                                                                                         |            |                                                |            |                                               |            |                                               |            |
| Co(1)-O(9) <sup>#1</sup>                                                                                                                                 | 1.942(3)   | Co(1)-O(1)                                     | 1.993(3)   | Co(1)-N(6) <sup>#2</sup>                      | 2.004(3)   | Co(1)-N(3)                                    | 2.035(4)   |
| O(9) <sup>#1</sup> -Co(1)-O(1)                                                                                                                           | 104.33(13) | O(9) <sup>#1</sup> -Co(1)-N(6) <sup>#2</sup>   | 113.91(13) | O(9) <sup>#1</sup> -Co(1)-N(3)                | 114.92(13) | O(1)-Co(1)-N(3)                               | 94.66(13)  |
| N(6) <sup>#2</sup> -Co(1)-N(3)                                                                                                                           | 108.07(14) | O(1)-Co(1)-N(6) <sup>#2</sup>                  | 119.76(13) |                                               |            |                                               |            |
| Symmetry codes: #1 -x+1, y-1/2, -z+1/2; #2 x+1, y, z+1.                                                                                                  |            |                                                |            |                                               |            |                                               |            |
| <b>Complex 2</b>                                                                                                                                         |            |                                                |            |                                               |            |                                               |            |
| Mn(1)-O(12) <sup>#2</sup>                                                                                                                                | 2.127(3)   | Mn(1)-O(2W)                                    | 2.147(3)   | Mn(1)-O(7) <sup>#3</sup>                      | 2.206(3)   | Mn(2)-O(7) <sup>#3</sup>                      | 2.228(3)   |
| Mn(1)-O(1W)                                                                                                                                              | 2.132(4)   | Mn(1)-O(3)                                     | 2.179(3)   | Mn(2)-O(11) <sup>#2</sup>                     | 2.126(3)   | Mn(2)-O(2)                                    | 2.147(3)   |
| N(2)-O(4)                                                                                                                                                | 1.369(10)  | N(2)-O(8)                                      | 1.429(17)  | O(12) <sup>#2</sup> -Mn(1)-O(1W)              | 169.22(17) | O(12) <sup>#2</sup> -Mn(1)-O(2W)              | 85.79(14)  |
| O(1W)-Mn(1)-O(2W)                                                                                                                                        | 87.50(16)  | O(2W)-Mn(1)-O(7) <sup>#3</sup>                 | 142.88(13) | O(11) <sup>#2</sup> -Mn(2)-O(2) <sup>#5</sup> | 87.06(15)  | O(2) <sup>#5</sup> -Mn(2)-O(7) <sup>#6</sup>  | 79.13(13)  |
| O(12) <sup>#2</sup> -Mn(1)-O(3)                                                                                                                          | 95.11(15)  | O(3)-Mn(1)-O(7) <sup>#3</sup>                  | 121.49(13) | O(11) <sup>#4</sup> -Mn(2)-O(2) <sup>#5</sup> | 92.94(15)  | O(11) <sup>#2</sup> -Mn(2)-O(7) <sup>#3</sup> | 89.02(13)  |
| O(1W)-Mn(1)-O(3)                                                                                                                                         | 93.94(19)  | O(11) <sup>#2</sup> -Mn(2)-O(11) <sup>#4</sup> | 180.000(1) | O(2)-Mn(2)-O(2) <sup>#5</sup>                 | 180.000(1) | O(11) <sup>#4</sup> -Mn(2)-O(7) <sup>#3</sup> | 90.98(13)  |
| O(2W)-Mn(1)-O(3)                                                                                                                                         | 95.62(15)  | O(11) <sup>#2</sup> -Mn(2)-O(2)                | 92.94(15)  | O(11) <sup>#2</sup> -Mn(2)-O(7) <sup>#6</sup> | 90.98(13)  | O(2)-Mn(2)-O(7) <sup>#3</sup>                 | 79.13(13)  |
| O(12) <sup>#2</sup> -Mn(1)-O(7) <sup>#3</sup>                                                                                                            | 91.37(13)  | O(11) <sup>#4</sup> -Mn(2)-O(2)                | 87.06(15)  | O(11) <sup>#4</sup> -Mn(2)-O(7) <sup>#6</sup> | 89.02(13)  | O(2) <sup>#5</sup> -Mn(2)-O(7) <sup>#3</sup>  | 100.87(13) |
| O(1W)-Mn(1)-O(7) <sup>#3</sup>                                                                                                                           | 88.90(16)  | O(2)-Mn(2)-O(7) <sup>#6</sup>                  | 100.87(13) | O(7) <sup>#6</sup> -Mn(2)-O(7) <sup>#3</sup>  | 180.000(1) |                                               |            |
| Symmetry codes: #2 x-1, y+1, z; #3 x-1, y, z;<br>#4 -x+1, -y+1, -z+2; #5 -x, -y+2, -z+2; #6 -x+1, -y+2, -z+2; #7 x+1, y, z; #8 x+1, y-1, z.              |            |                                                |            |                                               |            |                                               |            |
| <b>Complex 3</b>                                                                                                                                         |            |                                                |            |                                               |            |                                               |            |
| Cd(1)-O(7) <sup>#1</sup>                                                                                                                                 | 2.230(3)   | Cd(1)-O(4) <sup>#3</sup>                       | 2.263(3)   | Cd(2)-O(3) <sup>#7</sup>                      | 2.247(3)   | Cd(2)-O(6)                                    | 2.306(3)   |
| Cd(1)-O(1)                                                                                                                                               | 2.332(3)   | Cd(2)-O(8) <sup>#6</sup>                       | 2.199(3)   | Cd(2)-O(1) <sup>#8</sup>                      | 2.248(3)   | Cd(2)-O(5)                                    | 2.395(3)   |
| N(1)-O(9)                                                                                                                                                | 1.295(11)  | N(2)-O(10)                                     | 1.250(11)  | O(7) <sup>#1</sup> -Cd(1)-O(7) <sup>#2</sup>  | 180.000(1) | O(7) <sup>#1</sup> -Cd(1)-O(4) <sup>#3</sup>  | 86.27(13)  |
| O(7) <sup>#2</sup> -Cd(1)-O(4) <sup>#3</sup>                                                                                                             | 93.73(13)  | O(4) <sup>#3</sup> -Cd(1)-O(1)                 | 85.17(12)  | O(1)-Cd(1)-O(1) <sup>#5</sup>                 | 180.000(1) | O(1) <sup>#8</sup> -Cd(2)-O(6)                | 137.69(12) |
| O(7) <sup>#1</sup> -Cd(1)-O(4) <sup>#4</sup>                                                                                                             | 93.73(13)  | O(4) <sup>#4</sup> -Cd(1)-O(1)                 | 94.83(12)  | O(8) <sup>#6</sup> -Cd(2)-O(3) <sup>#7</sup>  | 98.42(14)  | O(8) <sup>#6</sup> -Cd(2)-O(5)                | 152.69(12) |
| O(7) <sup>#2</sup> -Cd(1)-O(4) <sup>#4</sup>                                                                                                             | 86.27(13)  | O(7) <sup>#1</sup> -Cd(1)-O(1) <sup>#5</sup>   | 89.62(11)  | O(8) <sup>#6</sup> -Cd(2)-O(1) <sup>#8</sup>  | 101.44(12) | O(3) <sup>#7</sup> -Cd(2)-O(5)                | 91.33(14)  |
| O(4) <sup>#3</sup> -Cd(1)-O(4) <sup>#4</sup>                                                                                                             | 180.000(1) | O(7) <sup>#2</sup> -Cd(1)-O(1) <sup>#5</sup>   | 90.38(11)  | O(3) <sup>#7</sup> -Cd(2)-O(1) <sup>#8</sup>  | 114.23(11) | O(1) <sup>#8</sup> -Cd(2)-O(5)                | 97.59(12)  |
| O(7) <sup>#1</sup> -Cd(1)-O(1)                                                                                                                           | 90.38(11)  | O(4) <sup>#3</sup> -Cd(1)-O(1) <sup>#5</sup>   | 94.83(12)  | O(8) <sup>#6</sup> -Cd(2)-O(6)                | 97.99(12)  | O(6)-Cd(2)-O(5)                               | 55.09(12)  |
| O(7) <sup>#2</sup> -Cd(1)-O(1)                                                                                                                           | 89.62(11)  | O(4) <sup>#4</sup> -Cd(1)-O(1) <sup>#5</sup>   | 85.17(12)  | O(3) <sup>#7</sup> -Cd(2)-O(6)                | 99.43(13)  |                                               |            |
| Symmetry codes: #1 -x+1, -y+1, -z; #2 x, y, z+1; #3 x-1, y, z; #4 -x+2, -y+1, -z+1; #5 -x+1, -y+1, -z+1; #6 x, y-1, z; #7 x-1, y-1, z-1; #8 x, y-1, z-1. |            |                                                |            |                                               |            |                                               |            |
| <b>Complex 4</b>                                                                                                                                         |            |                                                |            |                                               |            |                                               |            |
| Cd(1)-N(5) <sup>#1</sup>                                                                                                                                 | 2.192(5)   | Cd(1)-O(2)                                     | 2.233(4)   | Cd(1)-O(2) <sup>#3</sup>                      | 2.576(5)   | O(5)-N(9)                                     | 1.194(9)   |
| Cd(1)-O(7) <sup>#2</sup>                                                                                                                                 | 2.197(5)   | Cd(1)-N(6)                                     | 2.297(5)   | Cd(1)-O(3)                                    | 2.631(4)   | O(4)-N(9)                                     | 1.195(9)   |
| N(5) <sup>#1</sup> -Cd(1)-O(7) <sup>#2</sup>                                                                                                             | 128.20(18) | O(7) <sup>#2</sup> -Cd(1)-N(6)                 | 90.07(18)  | O(2)-Cd(1)-O(2) <sup>#3</sup>                 | 76.59(17)  | O(2)-Cd(1)-O(3)                               | 53.24(15)  |
| N(5) <sup>#1</sup> -Cd(1)-O(2)                                                                                                                           | 127.72(17) | O(2)-Cd(1)-N(6)                                | 104.25(17) | N(6)-Cd(1)-O(2) <sup>#3</sup>                 | 173.25(16) | N(6)-Cd(1)-O(3)                               | 84.51(17)  |
| O(7) <sup>#2</sup> -Cd(1)-O(2)                                                                                                                           | 99.40(17)  | N(5) <sup>#1</sup> -Cd(1)-O(2) <sup>#3</sup>   | 87.73(17)  | N(5) <sup>#1</sup> -Cd(1)-O(3)                | 82.66(16)  | O(2) <sup>#3</sup> -Cd(1)-O(3)                | 101.08(14) |
| N(5) <sup>#1</sup> -Cd(1)-N(6)                                                                                                                           | 96.80(19)  | O(7) <sup>#2</sup> -Cd(1)-O(2) <sup>#3</sup>   | 83.19(16)  | O(7) <sup>#2</sup> -Cd(1)-O(3)                | 149.13(17) |                                               |            |
| Symmetry codes: #1 -x+1, y-1, -z+1/2; #2 x+1/2, y+1/2, z; #3 -x+1, -y, -z+1.                                                                             |            |                                                |            |                                               |            |                                               |            |
